# Supplementary material
Source: PubMed Central journal article supplement (PMC6200419)
Supplement: NIHMS1506548-supplement-1.pdf [file NIHMS1506548-supplement-1.pdf]

**Supplemental Material for:**

**Differential Wnt-mediated Programming and Arrhythmogenesis in Right versus Left Ventricles**

**Authors:**

Gang Li, Aditi Khandekar, Tiankai Yin, Stephanie C. Hicks, Qiusha Guo, Kentaro Takahashi, Catherine E. Lipovsky, Brittany D. Brumback, Praveen K. Rao, Carla J. Weinheimer, Stacey L. Rentschler

Correspondence should be addressed to Stacey L. Rentschler

([Stacey.rentschler@wustl.edu](mailto:Stacey.rentschler@wustl.edu))

## Supplemental Figures with Legends

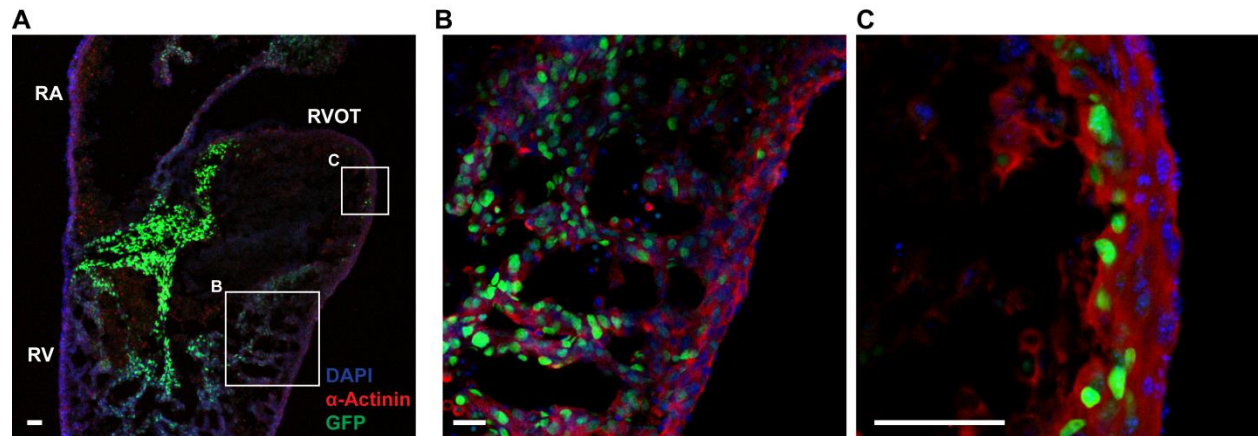

**Supplemental Figure 1. Wnt signaling is active in RV and RVOT cardiomyocytes during development.** (A) Sections from E12.5 TCF/Lef:H2B-GFP reporter mice show Wnt activity, as reported by nuclear GFP expression, is highest within the atrioventricular region. In addition, Wnt signaling is found in the right ventricle (RV) and right ventricular outflow tract (RVOT) in myocytes and non-myocytes. Immunostaining with  $\alpha$ -actinin (red) and DAPI (blue) reveals a high percentage of cardiomyocytes have active Wnt signaling at this developmental stage. (B) Higher magnification view of the region within the RV from panel A shows higher GFP expression in cardiomyocytes of the trabecular region compared with the compact zone of the ventricular myocardium. (C) Higher magnification view of the RVOT region from panel A shows Wnt activity is active within RVOT cardiomyocytes. Scale bar in each image = 50  $\mu$ m. RA=right atrium.

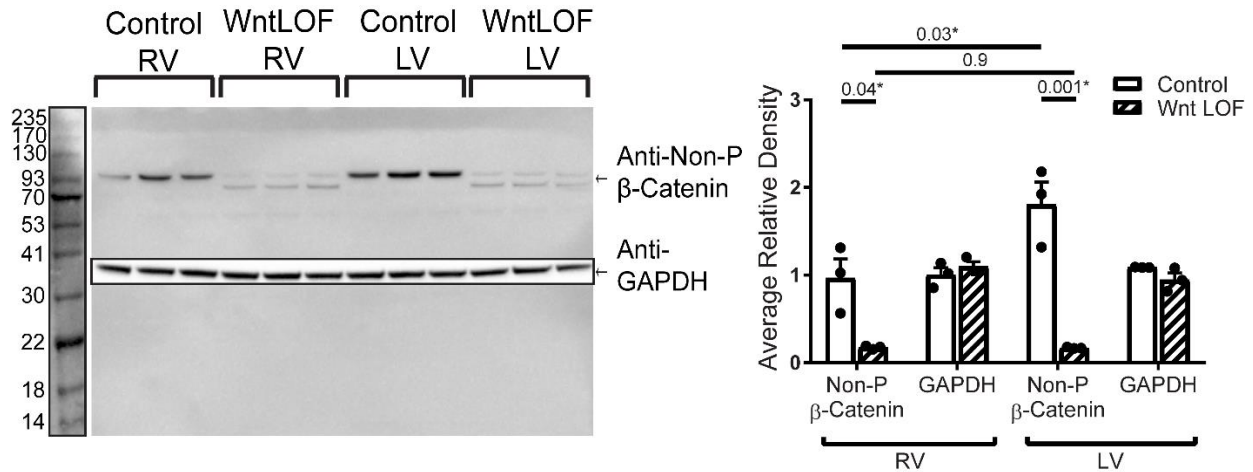

**Supplemental Figure 2. Non-phosphorylated (active)  $\beta$ -catenin levels are higher in control left ventricle when compared with right ventricle.** Western blot for non-phosphorylated (active)  $\beta$ -catenin in adult control ( $\beta$ -cat<sup>fl/+</sup>) and littermate Wnt LOF (*Mlc2v<sup>Cre/+</sup>;  $\beta$ -cat<sup>fl/DM</sup>*) mice (n=3 each genotype). Wnt LOF mice express a truncated  $\beta$ -catenin protein at approximately 70kDa, in addition to wild type  $\beta$ -catenin at 93kDa, as expected from the loss of function model. GAPDH is used for normalization, and quantification of protein levels based on band density shows significantly reduced  $\beta$ -catenin in control RV compared to control LV. One-way ANOVA and post-hoc Tukey's test were performed to determine statistical significance. \*P<0.05 was considered statistically significant.

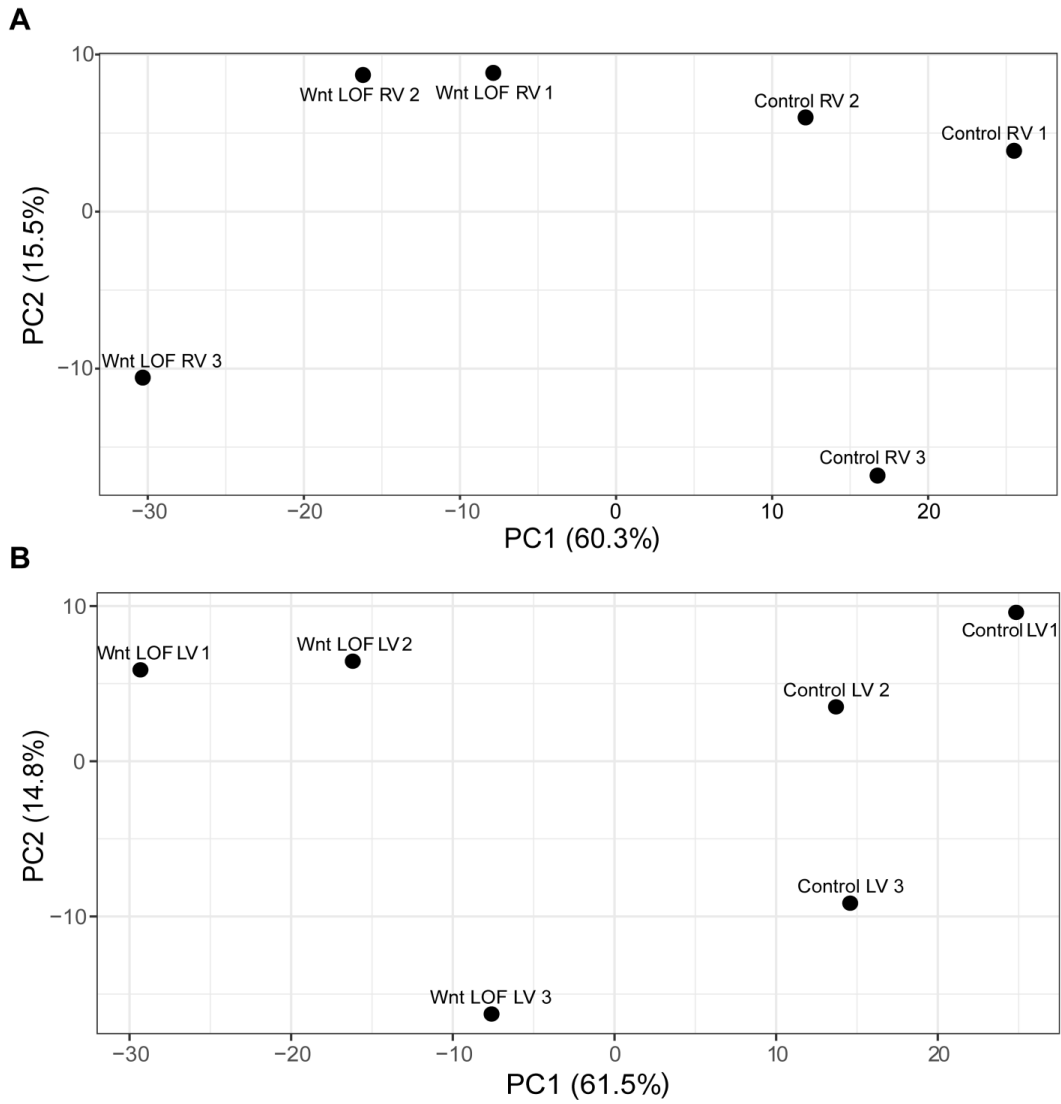

**Supplemental Figure 3. Principal Component analysis of Wnt loss-of-function RNA-seq transcript results. Both Wnt LOF RV (A) and Wnt LOF LV (B) are separated from their respective controls in the first principal component.**

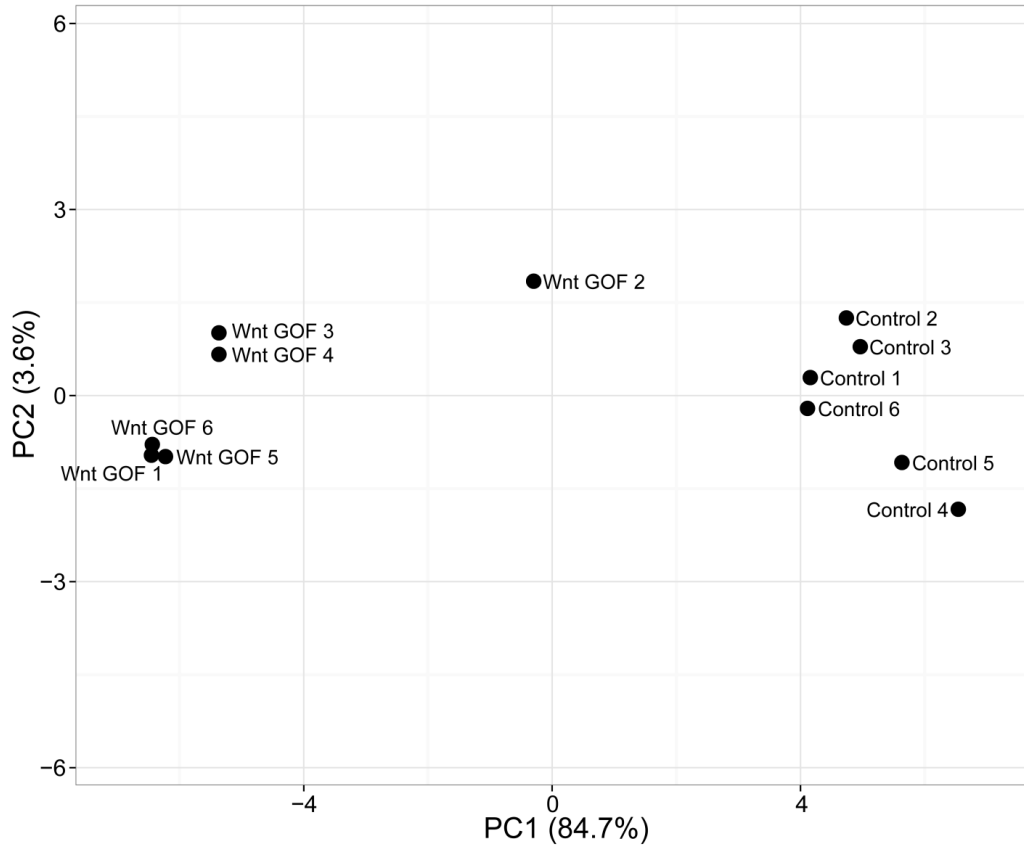

**Supplemental Figure 4. Principal Component analysis of Wnt gain-of-function RNA-sequencing transcript results.** All 6 control and 5 of 6 Wnt GOF samples cluster closely together with clear separation between control and Wnt GOF samples.

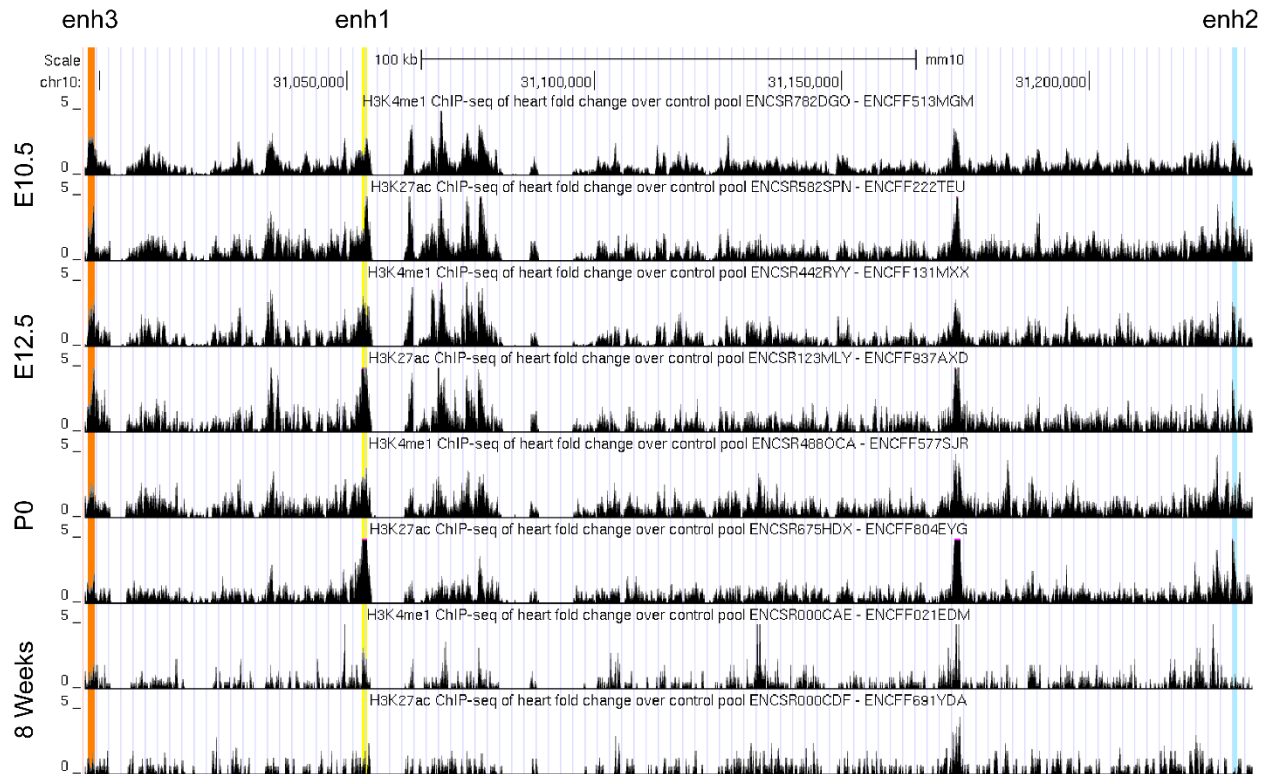

**Supplemental Figure 5. ENCODE data of mouse heart H3K4me1 and H3K27ac seq shows peaks near *Hrt2* enhancers.** Mouse heart ChIP-seq for H3K4me1 and H3K27ac from ENCODE in embryonic day 10.5 and 12.5 (E10.5, E12.5), postnatal day 0 (P0), and adult (8 Weeks) show enrichment peaks at all three *Hrt2* enhancer sequences at E10.5, E12.5 and P0 compared to control, with decreased amplitude of the peaks in adult hearts. This is consistent with the known decrease in *Hrt2* expression postnatally.



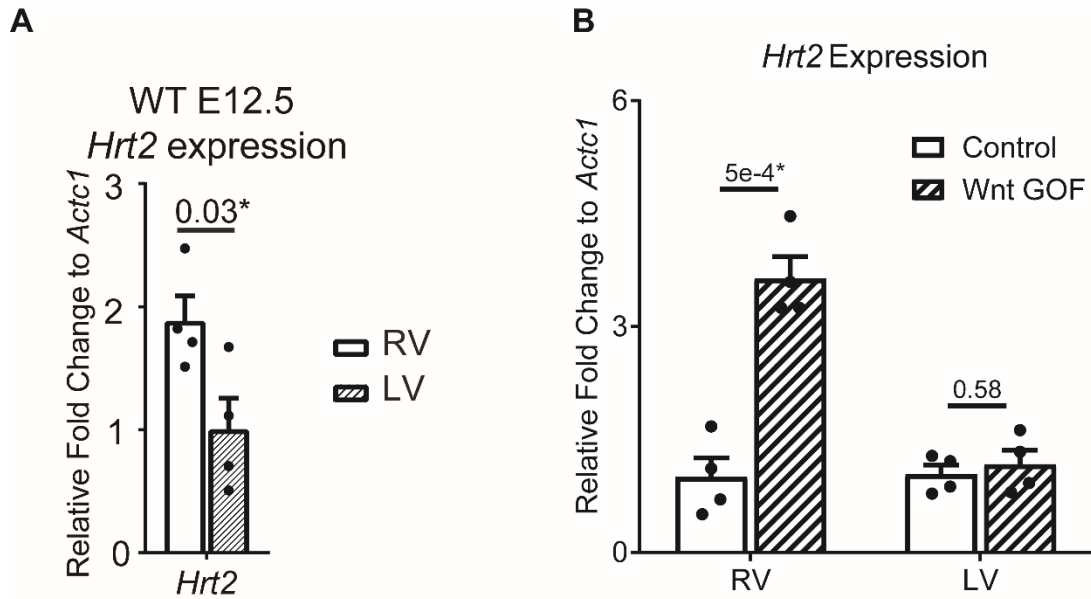

**Supplemental Figure 7. *Hrt2* expression in embryonic wild type and in adult Wnt gain-of-function ventricles.** (A) qRT-PCR of WT E12.5 primitive right and left ventricles (n= 4 each) shows 1.8-fold higher *Hrt2* expression in embryonic RV compared to LV. (B) Comparison of RV and LV of control (*Mlc2v<sup>Cre/+</sup>*) versus Wnt GOF (*Mlc2v<sup>Cre/+</sup>; Ctnnb1<sup>fl(ex3)/+</sup>*) shows increased *Hrt2* expression in RV only (n=4 each group). An equal variance Student's t test was used for comparisons. \*P<0.05 was considered statistically significant.



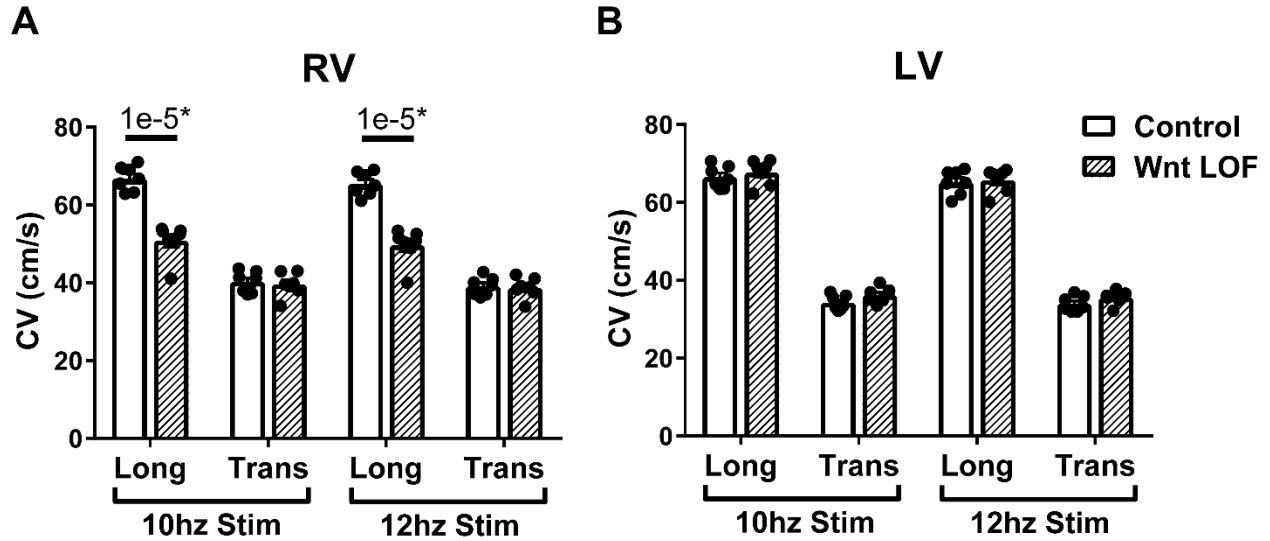

**Supplemental Figure 8. Conduction velocity is slower in Wnt loss-of-function right ventricles when paced at physiologic rates.** Longitudinal and transverse conduction velocities from control and Wnt LOF hearts (n=7 each genotype) show significantly reduced RV longitudinal CV compared with control RV (A) at 10Hz and 12Hz stimulation, while both longitudinal and transverse CV is unchanged in the LV (B). An equal variance Student's t test was used for comparisons, \*P<0.05 were considered statistically significant. Long = longitudinal, Trans = transverse.

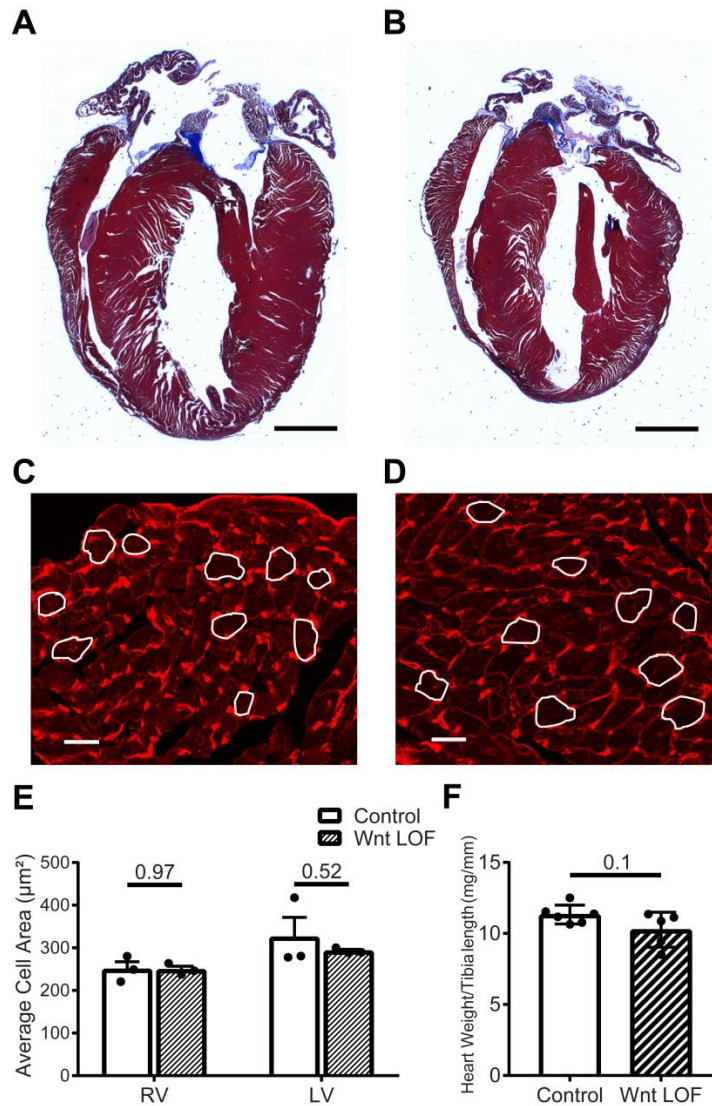

**Supplemental Figure 9. Structural determinants of conduction velocity are not changed in Wnt loss-of-function hearts.** Representative images of Masson's Trichrome stain of control (A) and littermate Wnt LOF (B) heart shows no gross structural heart defects (n=3 each genotype). Scale = 1000 µm. Wheat germ agglutinin staining of cell membranes shows no gross difference in transverse myocyte cross-sectional area between control (C) and littermate Wnt LOF (D) RV cardiomyocytes. Representative cells used for quantification are outlined in white. Only ventricular myocytes sectioned perpendicularly, as evidence by circular morphology, were included in the analysis. Scale = 25 µm. (E) Quantification of RV and LV myocyte cross-sectional area shows no significant differences between control and Wnt LOF hearts (n=3 each genotype). Each data point represents the average area of more than 100 cells from the same heart. (F) Wnt LOF mice are smaller when compared with littermate control mice of the same age, however, the heart weight to tibia length ratio is not significantly different (n=6 each genotype). An equal variance Student's t test was used for comparisons. \*P<0.05 was considered statistically significant.

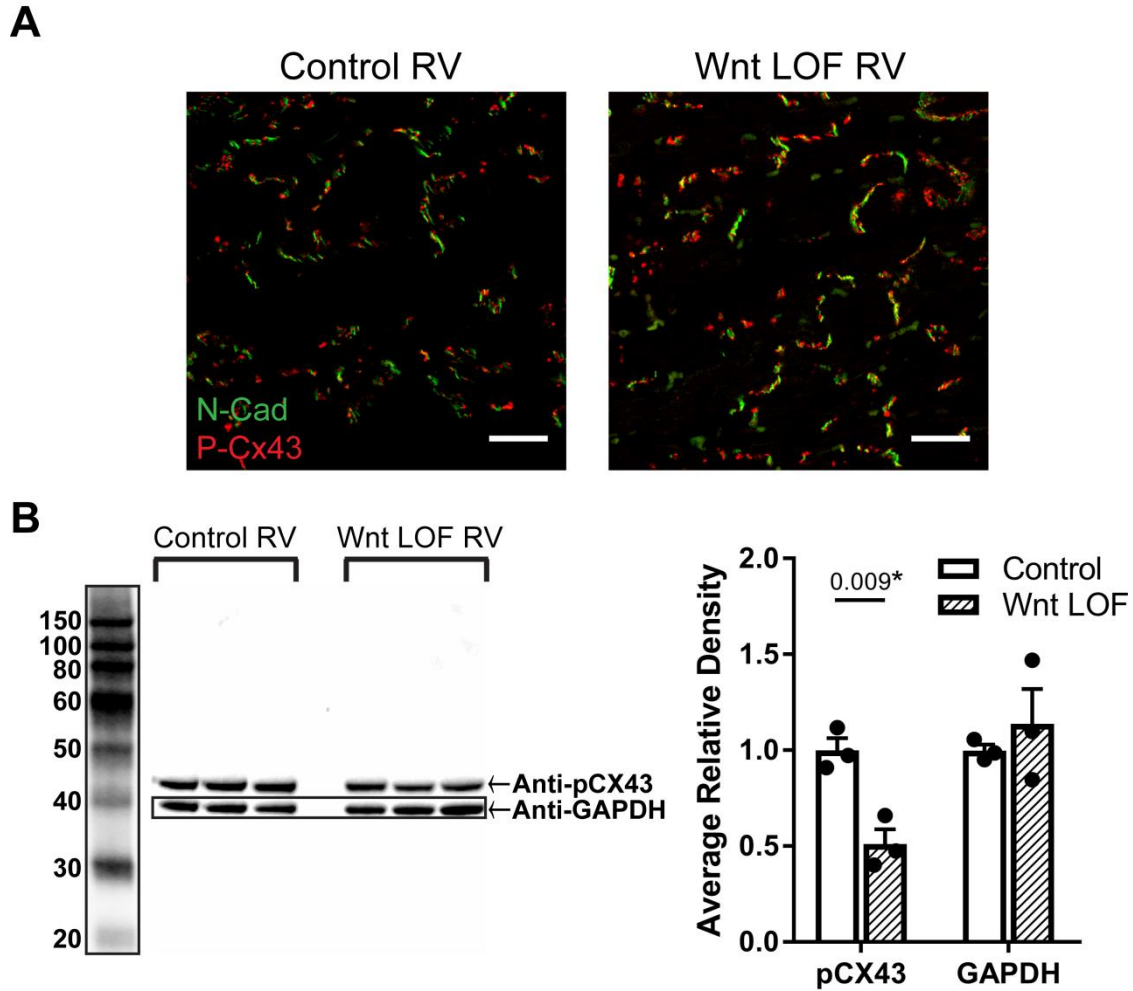

**Supplemental Figure 10. Levels and localization of phospho-Connexin 43 (pCx43) are unchanged in Wnt loss-of-function RV.** (A) Representative image of immunostaining of pCx43 (red) and N-Cadherin (green) shows strong co-localization at the intercalated disc in both control (*Ctnnb1<sup>flox/+</sup>*) and littermate Wnt LOF (*Mlc2v<sup>Cre/+</sup>; Ctnnb1<sup>dm/flox</sup>*) RV without evidence of lateralization (n=3 each genotype). Scale = 20  $\mu$ m. (B) Western blot comparing levels of pCx43 (~42 kDa) in control RV and littermate Wnt LOF RV (n= 3 each genotype). GAPDH is used for normalization, and quantification of protein levels based on band density shows a 50% reduction of pCx43 in Wnt LOF RV, similar to the reduction of total Cx43 levels. An equal variance Student's t test was used for comparisons. \*P<0.05 was considered statistically significant.

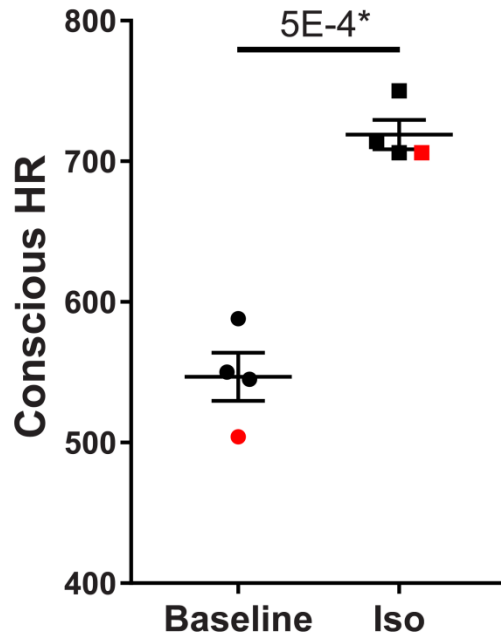

**Supplemental Figure 11. Heart rate as measured by telemetry is increased following isoproterenol injection.** Heart rate recorded via telemetry in control (*Ctnnb1<sup>flox/+</sup>*, n= 1, red) and Wnt LOF (*Mlc2v<sup>Cre/+</sup>; Ctnnb1<sup>dm/flox</sup>*, n= 3, black) mice shows increased HR following intraperitoneal isoproterenol injection. However, no spontaneous arrhythmias were observed in either condition. A paired t test was used to determine significance between baseline and isoproterenol HR. \*P<0.05 was considered statistically significant.

## Supplemental Tables

Supplemental Table 1. List of transcripts changed in both Wnt LOF RV and LV

| Gene Name     | RV          |         | LV          |         |
|---------------|-------------|---------|-------------|---------|
|               | Fold Change | p-value | Fold Change | p-value |
| 1110008P14Rik | 1.22        | 0.0378  | -1.35       | 0.006   |
| A930005H10Rik | -1.54       | 0.0201  | -1.81       | 0.0057  |
| Abra          | -1.30       | 0.0374  | -1.52       | 0.0033  |
| Actc1         | 1.17        | 0.0352  | -1.23       | 0.0087  |
| Adcy4         | -1.25       | 0.0391  | -1.31       | 0.0171  |
| Adhfe1        | -1.32       | 0.0063  | -1.25       | 0.0248  |
| Alas2         | -1.22       | 0.0394  | 1.24        | 0.0397  |
| Amz1          | -1.50       | 0.0189  | 2.09        | 0.0008  |
| Ano4          | 1.43        | 0.0010  | 1.38        | 0.0029  |
| Aqp1          | -1.41       | 0.0008  | -1.22       | 0.0266  |
| Auts2         | 1.19        | 0.0318  | 1.26        | 0.0067  |
| B330016D10Rik | 1.31        | 0.0226  | 1.29        | 0.035   |
| Bcl11b        | 1.54        | 0.0037  | 1.41        | 0.0239  |
| Bicd1         | 1.25        | 0.0107  | 1.18        | 0.0461  |
| Brca2         | 1.23        | 0.0482  | 1.28        | 0.0231  |
| C920006O11Rik | 2.79        | 0.0018  | 2.07        | 0.0137  |
| Cnih4         | 1.38        | 0.0066  | 1.26        | 0.0399  |
| csf1          | 1.37        | 0.0010  | 1.26        | 0.01    |
| Decr2         | -1.18       | 0.0148  | -1.14       | 0.0422  |
| Dixdc1        | 1.32        | 0.0214  | 1.29        | 0.0391  |
| Dnajc5        | 1.51        | 0.0250  | 1.44        | 0.0452  |
| Dnm3os        | 1.26        | 0.0319  | 1.25        | 0.0392  |
| Dysf          | 1.12        | 0.0319  | 1.17        | 0.0072  |
| Ednrb         | -1.29       | 0.0283  | -1.59       | 0.0007  |
| Fabp5         | -1.57       | 0.0025  | -1.54       | 0.0039  |
| Fam220a       | -1.13       | 0.0454  | -1.17       | 0.0147  |
| Fasn          | 1.15        | 0.0290  | 1.16        | 0.0232  |
| G0s2          | -1.31       | 0.0371  | -1.35       | 0.0302  |
| Gm15334       | 1.30        | 0.0347  | 1.37        | 0.0123  |
| Gm15446       | 2.17        | 0.0018  | 1.56        | 0.0361  |
| Gm17203       | 1.41        | 0.0480  | 1.69        | 0.0061  |
| Gm24041       | -1.47       | 0.0219  | 1.50        | 0.0211  |
| Gm28979       | 1.40        | 0.0190  | 1.34        | 0.0438  |
| Gm6612        | -5.38       | 0.0218  | -4.50       | 0.0414  |
| Heatr5b       | -1.31       | 0.0028  | -1.18       | 0.05    |
| Hsd17b7       | 6.76        | 0.0015  | 4.91        | 0.0059  |
| Hsp90aa1      | -1.30       | 0.0250  | -1.35       | 0.0101  |
| Hspa12a       | 1.36        | 0.0021  | 1.34        | 0.0029  |
| Ky            | 1.26        | 0.0086  | 1.18        | 0.045   |

|           |       |        |       |        |
|-----------|-------|--------|-------|--------|
| Lgi2      | 2.55  | 0.0022 | 3.03  | 0.0008 |
| Lgr6      | 1.48  | 0.0147 | 1.38  | 0.0379 |
| Lrif1     | 1.16  | 0.0298 | -1.14 | 0.0477 |
| Ly6e      | 1.24  | 0.0097 | -1.24 | 0.0109 |
| Ly75      | 1.32  | 0.0439 | 1.44  | 0.0153 |
| Maf       | -1.22 | 0.0163 | 1.28  | 0.0135 |
| Mical2    | -1.18 | 0.0334 | -1.20 | 0.024  |
| Muc5b     | -1.59 | 0.0472 | 2.28  | 0.0032 |
| Mylk4     | 1.22  | 0.0356 | 1.23  | 0.0279 |
| Mzt1      | 1.20  | 0.0432 | 1.24  | 0.0232 |
| Nfia      | 1.22  | 0.0120 | 1.22  | 0.0132 |
| Nxpe4     | 17.36 | 0.0152 | 5.13  | 0.0429 |
| Olfml2b   | -1.40 | 0.0014 | -1.40 | 0.0018 |
| P4ha1     | -1.25 | 0.0412 | -1.30 | 0.0209 |
| Pcp4l1    | 1.31  | 0.0079 | 1.33  | 0.0072 |
| Pdgfc     | 2.09  | 0.0017 | 1.46  | 0.0484 |
| Plb1      | 1.49  | 0.0314 | 1.50  | 0.0378 |
| Plin2     | -1.33 | 0.0008 | -1.23 | 0.0083 |
| Plscr2    | 1.14  | 0.0485 | 1.15  | 0.0356 |
| Ppil1     | -1.48 | 0.0208 | -1.61 | 0.0098 |
| Ppp1r16b  | -1.18 | 0.0295 | -1.29 | 0.0021 |
| Prox1     | 1.21  | 0.0140 | 1.20  | 0.0218 |
| Rab37     | 2.06  | 0.0149 | 1.81  | 0.0266 |
| Rab6b     | 6.19  | 0.0035 | 3.39  | 0.0297 |
| Reps2     | 1.25  | 0.0471 | 1.35  | 0.0118 |
| Rgs4      | -1.34 | 0.0444 | -1.37 | 0.0334 |
| Ripor2    | 1.34  | 0.0198 | 1.49  | 0.0036 |
| Rnf150    | 1.16  | 0.0192 | 1.15  | 0.0241 |
| Rpl26     | 2.20  | 0.0304 | 3.07  | 0.0061 |
| Rps2-ps13 | 12.79 | 0.0158 | 15.61 | 0.0277 |
| Rtca      | -1.25 | 0.0378 | -1.28 | 0.0295 |
| Rybp      | 1.32  | 0.0372 | -1.35 | 0.0268 |
| Serpine1  | -1.41 | 0.0016 | -1.39 | 0.0024 |
| Setbp1    | 1.24  | 0.0500 | 1.26  | 0.0397 |
| Slc12a9   | 1.38  | 0.0170 | 1.41  | 0.0097 |
| Slc38a1   | 1.56  | 0.0176 | 1.45  | 0.0371 |
| Smoc2     | -1.18 | 0.0242 | -1.16 | 0.0459 |
| Sqstm1    | -1.17 | 0.0307 | -1.21 | 0.0139 |
| Tjap1     | -1.19 | 0.0412 | -1.22 | 0.0236 |
| Tuba1a    | -1.31 | 0.0447 | -1.32 | 0.0421 |
| Tubb2b    | -2.00 | 0.0146 | -1.84 | 0.0276 |
| Uba52     | -1.29 | 0.0266 | -1.33 | 0.0248 |
| Zfp608    | -1.15 | 0.0496 | -1.16 | 0.0466 |

**Supplemental Table 2. List of Wnt-mediated genes from RNA-sequencing of Wnt GOF embryonic ventricles**

| <b>Gene Name</b> | <b>Fold Change</b> | <b>p-value</b> |
|------------------|--------------------|----------------|
| 1700080G11Rik    | 5.95               | 0.0422         |
| Adamts3          | -1.54              | 0.0494         |
| Angpt1           | 1.56               | 0.0343         |
| Aplp2            | 1.64               | 0.0378         |
| Bco2             | 7.89               | 0.0289         |
| Ccnd2            | 1.42               | 0.0378         |
| Cdh6             | 2.38               | 0.0286         |
| Col23a1          | 1.47               | 0.0378         |
| Creg2            | 5.76               | 0.0378         |
| Cyp26b1          | 5.97               | 0.0378         |
| Dkk4             | 10.94              | 0.0098         |
| Eln              | -3.67              | 0.0378         |
| Fam213b          | -1.51              | 0.0472         |
| Fibcd1           | 17.19              | 0.0343         |
| Gm26984          | 5.65               | 0.0422         |
| Gm29521          | 11.06              | 0.0104         |
| Gnb1             | -1.51              | 0.0343         |
| Hrt2             | 1.34               | 0.0343         |
| Hsbp1l1          | 2.18               | 0.0378         |
| Hspa2            | 2.07               | 0.0098         |
| Jakmip3          | 6.93               | 0.0378         |
| Lgi1             | 5.89               | 0.0378         |
| Limch1           | 1.33               | 0.0472         |
| Notumos          | 6.36               | 0.0343         |
| Nupr1            | -2.98              | 0.0022         |
| Rab33a           | 2.87               | 0.0343         |
| Rgs5             | -6.37              | 0.0209         |
| Rnf43            | 3.96               | 0.0453         |
| Rxfp1            | 5.07               | 0.0378         |
| Scn4b            | 5.48               | 0.0422         |
| Skap1            | 5.49               | 0.0343         |
| Slc13a4          | 3.48               | 0.0422         |
| Smoc2            | -2.01              | 0.0286         |
| Sp5              | 16.74              | 0.0286         |
| Tenm2            | 1.84               | 0.0289         |
| Trpm1            | 6.32               | 0.0289         |

**Supplemental Table 3. Microelectrode Recordings**

|                          | Control RV<br>n=5 | Wnt LOF RV<br>n=5 | Control LV<br>n=5 | Wnt LOF LV<br>n=5 |
|--------------------------|-------------------|-------------------|-------------------|-------------------|
| RMP, mV                  | -79.6 ± 0.5       | -78.7 ± 0.6       | -79.0 ± 0.4       | -78.6 ± 0.6       |
| APA, mV                  | 87.6 ± 0.9        | 90.1 ± 1.0        | 81.2 ± 1.4        | 83.7 ± 1.5        |
| $dV_m/dt_{max}$ , V/sec  | 230.0 ± 6.4       | 250.5 ± 4.3*      | 180.6 ± 9.2^      | 173.8 ± 7.5       |
| APD <sub>90</sub> , msec | 48.9 ± 5.1        | 43.7 ± 2.7        | 65.2 ± 5.2^       | 57.3 ± 2.6        |

Action potential parameters from 8-10 cells are averaged to yield a value per mouse. The average result from n=5 mice per genotype are expressed as mean ± SEM. Control indicates *Ctnnb1<sup>flox/+</sup>* and Wnt LOF indicates *Mlc2v<sup>Cre/+</sup>; Ctnnb1<sup>dm/flox</sup>* experimental groups. Statistics were performed using a one-way ANOVA followed by a Tukey's multiple comparisons test. Values of P<0.05 were considered statistically significant in comparison between control RV versus control LV (^P<0.05), as well as Wnt LOF vs. control mice (\*P<0.05). RMP = resting membrane potential; APA = action potential amplitude;  $dV_m/dt_{max}$  = maximal upstroke velocity; APD<sub>90</sub> = duration of the action potential at 90% repolarization.



## **Supplemental Video Legends**

**Supplemental Video 1.** Phase movie of a Wnt LOF heart in sinus rhythm during an optical mapping experiment with RA and RV in view. The earliest ventricular breakthrough is near the apex of the RV.

**Supplemental Video 2.** Phase movie of the same Wnt LOF heart from Supplemental Video 1 during ventricular tachycardia induced by physiologic RV stimulation as viewed from the anterior surface. A line of functional block with reentry can be seen with alternating beats near the septum.
